# Supplementary material for: Deficiency in interleukin-18 promotes differentiation of brown adipose tissue resulting in fat accumulation despite dyslipidemia
Source: J Transl Med. 2018 Nov 19;16:314. doi: 10.1186/s12967-018-1684-3 (PMC6245626; doi:10.1186/s12967-018-1684-3)
Supplement: Supplementary file 1 — Additional file 1. Primer sequences used for qRT-PCR. [file 12967_2018_1684_MOESM1_ESM.xlsx]

## Sheet: Sheet1
the structure of primers
Genbank Accession	Gene		Primers ( 5' - 3' )
NM_007393.5	Actb	sense	CCAGCCTTCCTTCTTGGGTA
		anti-sense	CTTTACGGATGTCAACGTCACAC
NM_013462	Adrb3	sense	GCAGAGTCCACCGCTCAACA
		anti-sense	CTGGATCTTCACGGCCCTTC
NM_023114	Apoc3	sense	CCATGCAGCCCCGGAC
		anti-sense	CCAGCAGCAAGGATCCCTC
NM_007557	Bmp7	sense	AATTCTTCCACCCTCGATACCAC
		anti-sense	TCGCTCCCGGATGTAGTCCT
NM_007643	Cd36	sense	AGAACAGCAGCAAAATCAAGGT
		anti-sense	GGGTCCTGAGTTATATTTTCCTTGGCTA
NM_009883	Cebpb	sense	GAAAAGAGGCGTATGTATATTTTGAGAACCTT
		anti-sense	TGTCTTCACTTTAATGCTCGAAACGG
NM_007702	Cidea	sense	AATGTCAAAGCCACGATGTACGAG
		anti-sense	TAAACCTCAGCAGATTCCTTAACACGG
NM_010050	Dio2	sense	CCGAATGCCACCTTCTTGACT
		anti-sense	TGGCTGAACCAAAGTTGACCAC
NM_020013	Elovl3	sense	GCAGCACACCGCAGTCCA
		anti-sense	AGAAACCTAGAGGCTTTGACACC
NM_020013	Fabp4	sense	GCAGCACACCGCAGTCCA
		anti-sense	AGAAACCTAGAGGCTTTGACACC
NM_020013	Fgf21	sense	GCAGCACACCGCAGTCCA
		anti-sense	AGAAACCTAGAGGCTTTGACACC
NM_153526	Insig1	sense	ACCAATCTGAGCCTTGTATTCTCG
		anti-sense	ACGCACCTCTGAAATGACCC
NM_008493	Lep	sense	AACTCCCAAGCAGCACACGA
		anti-sense	TGGCTTGCTTCAGATCCATCC
NM_008904	Pgc1a	sense	TGTTTATAAATTCAGGACTAGCCATGGA
		anti-sense	TGCCATCCCAAGGGTAGCTC
NM_133249	Pgc1b	sense	TCTCTCCAGTGACATGAGCTCTCGG
		anti-sense	ACCTGGCACTCTACAATCTCACC
NM_011146	Pparg	sense	ATCTTAACTGCCGGATCCACA
		anti-sense	AGCAAGGCACTTCTGAAACCG
BC059838	Prdm16	sense	CGCCATGTGTCAGATCAACGA
		anti-sense	AGTTCCTCTCCAGGCTCGAT
NM_009463	Ucp1	sense	TACCAAGCTGTGCGATGTCC
		anti-sense	AGCACACAAACATGATGACGTT
NM_009464	Ucp3	sense	CCATAGGCAGCAAAGGAACCA
		anti-sense	CCCCAGGAACTTCACAACCG
NM_009504	Vdr	sense	ACTCCAAACAGTACCGTTCCC
		anti-sense	ATTGCCGAACACCTCTAGCAC
