# Supplementary material for: Deficiency in interleukin-18 promotes differentiation of brown adipose tissue resulting in fat accumulation despite dyslipidemia
Source: J Transl Med. 2018 Nov 19;16:314. doi: 10.1186/s12967-018-1684-3 (PMC6245626; doi:10.1186/s12967-018-1684-3)
Supplement: Supplementary file 4 — Additional file 4. Core analysis of molecules isolated at 6 weeks of age by microarray. Core analyses using IPA. [file 12967_2018_1684_MOESM4_ESM.xlsx]

## Sheet: TableS3
Diseases or Functions Annotation	p Value	Count
morphology of cells	0.00409	8
quantity of adipose tissue	0.00629	11
mass of genitourinary system	0.0066	6
quantity of white adipose tissue	0.0112	5
mass of fat pad	0.0114	6
morphology of adipocytes	0.0121	7
morphology of reproductive system	0.0132	6
differentiation of fibroblasts	0.0137	2
cell cycle progression	0.0169	2
morphology of white adipose tissue	0.0177	5
mass of adipose tissue	0.0182	8
size of cells	0.019	6
adipogenesis of mesenchymal stem cells	0.0205	1
concentration of palmitoleic acid	0.0205	1
deposition of fat pad	0.0205	1
development of innate lymphoid cells	0.0205	1
expansion of retrobulbar adipose tissue	0.0205	1
function of type 2 pulmonary innate lymphoid cells	0.0205	1
mobilization of macrophages	0.0205	1
production of L-triiodothyronine	0.0205	1
quantity of 2-arachidonoylglycerol	0.0205	1
quantity of 2-oleoylglycerol	0.0205	1
quantity of type 2 pulmonary innate lymphoid cells	0.0205	1
substitution of acinar gland cells	0.0205	1
substitution of adipose tissue	0.0205	1
abnormal morphology of adipocytes	0.025	3
uptake of D-glucose	0.025	3
morphology of connective tissue	0.027	10
differentiation of cells	0.0379	9
concentration of arachidonic acid	0.0406	1
concentration of docosahexaenoic acid	0.0406	1
concentration of eicosapentenoic acid	0.0406	1
deposition of subcutaneous fat	0.0406	1
ingestion by mice	0.0406	1
leakage of H+	0.0406	1
mass of adipocytes	0.0406	1
responsiveness of brown adipocytes	0.0406	1
