# Supplementary material for: Deficiency in interleukin-18 promotes differentiation of brown adipose tissue resulting in fat accumulation despite dyslipidemia
Source: J Transl Med. 2018 Nov 19;16:314. doi: 10.1186/s12967-018-1684-3 (PMC6245626; doi:10.1186/s12967-018-1684-3)
Supplement: Supplementary file 5 — Additional file 5. Core analysis of molecules isolated at 12 weeks of age by microarray. Core analyses using IPA. [file 12967_2018_1684_MOESM5_ESM.xlsx]

## Sheet: for table
Diseases or Functions Annotation	p Value	Count
quantity of adipose tissue	8.15e-06	20
differentiation of adipocytes	1.95e-05	19
morphology of connective tissue	8.22e-05	19
mass of adipose tissue	0.00027	14
generation of cells	0.000985	4
size of adipose tissue	0.00119	10
abnormality of adipose tissue	0.00119	11
differentiation of adipoblasts	0.00217	5
metabolism of DNA	0.00251	2
size of mitochondria	0.00251	2
cell cycle progression	0.00255	3
size of cells	0.0031	9
morphology of cells	0.00355	10
uptake of 2-deoxyglucose	0.00447	3
release of glycerol	0.00492	2
mass of fat pad	0.00536	8
dyslipidemia	0.00569	3
morphology of reproductive system	0.00649	8
concentration of lipid	0.00652	5
development of adipocytes	0.00708	3
inflammation of adipose tissue	0.00738	4
synthesis of DNA	0.00804	2
morphology of adipocytes	0.00888	9
size of adipocytes	0.0093	8
cell cycle progression of adipocytes	0.0118	2
concentration of cholesterol	0.0118	2
concentration of triacylglycerol	0.0124	3
abnormal morphology of adipose tissue	0.0199	7
morphology of white adipose tissue	0.0208	6
inflammatory response	0.0212	2
differentiation of embryonic cells	0.0268	2
differentiation of fibroblasts	0.0268	2
uptake of monosaccharide	0.0286	4
adhesion of endothelial cells	0.0293	1
adhesion of neutrophils	0.0293	1
apoptosis of endothelial cells	0.0293	1
cell cycle progression of adipoblasts	0.0293	1
concentration of sphingomyelin	0.0293	1
disposal of D-glucose	0.0293	1
expansion of white adipose tissue	0.0293	1
inflammation of adipocytes	0.0293	1
inflammatory response of adipose tissue	0.0293	1
initiation of G2/M phase transition of brown adipocytes	0.0293	1
initiation of S phase of brown adipocytes	0.0293	1
production of L-triiodothyronine	0.0293	1
production of reactive oxygen species	0.0293	1
proliferation of endothelial cells	0.0293	1
quantity of D-sphingosine	0.0293	1
quantity of ceramide	0.0293	1
quantity of fat pad	0.0293	1
quantity of mitochondrial DNA	0.0293	1
recruitment of myeloid-derived suppressor cells	0.0293	1
release of fatty acid	0.0293	1
synthesis of nitric oxide	0.0293	1
volume of subcutaneous fat	0.0293	1
weight loss of adipose tissue	0.0293	1
mass of genitourinary system	0.0325	6
glucose tolerance	0.0328	2
oxidation of fatty acid	0.0328	2
size of fat pad	0.0328	2
abnormal morphology of fat pad	0.0361	4
differentiation of stem cells	0.0394	2
mass of white adipose tissue	0.0431	3
glucose metabolism disorder	0.0473	3
